# Supplementary material for: Synergetic optimization of electronic and thermal transport for high-performance thermoelectric GeSe–AgSbTe2 alloy
Source: Royal Society of Chemistry journal article supplement (doi:10.1039/c8ta01393d), 2018-01-01
Supplement: c8ta01393d1.pdf [file c8ta01393d1.pdf]

Electronic Supplementary Information

Synergetic optimization of electronic and thermal transport for high-performance thermoelectric GeSe-AgSbTe<sub>2</sub> alloy

Mingtao Yan<sup>a,b,‡</sup>, Xiaojian Tan<sup>c,‡</sup>, Zhiwei Huang<sup>a</sup>, Guoqiang Liu<sup>c</sup>, Peng Jiang<sup>a,\*</sup>, Xinhe Bao<sup>a,\*</sup>

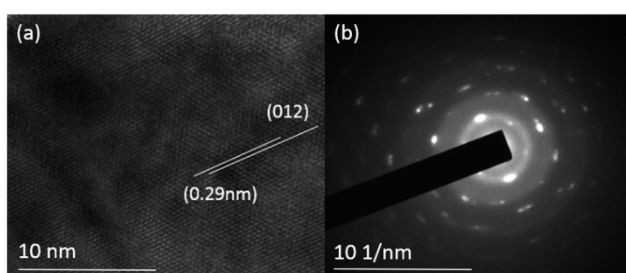

**Fig. S1** (a) HRTEM image and (b) SAED pattern of GeSeAg<sub>0.2</sub>Sb<sub>0.2</sub>Te<sub>0.4</sub>.

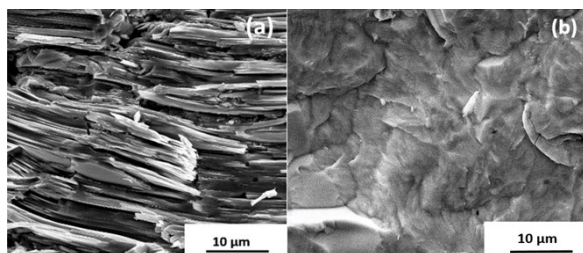

**Fig. S2** SEM images of pure GeSe (a) and GeSe-20%AgSbTe<sub>2</sub> (b).

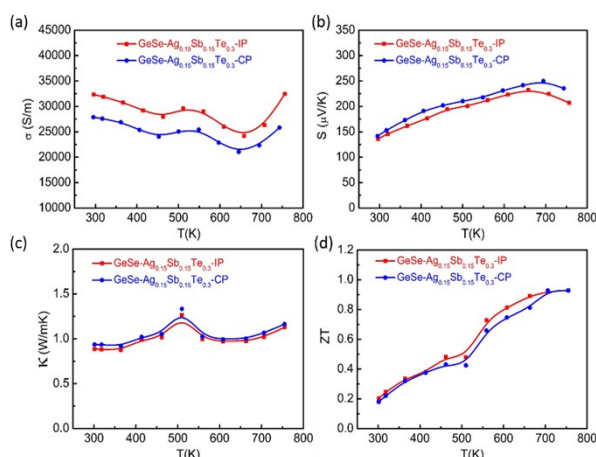

**Fig. S3** Thermoelectric properties of GeSe-15%AgSbTe<sub>2</sub> along the directions perpendicular (IP) and parallel (CP) to the pressing direction.

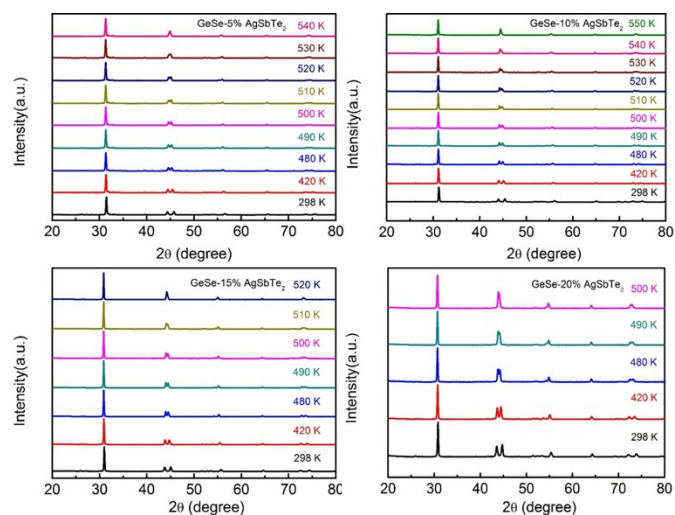

**Fig. S4** Temperature-dependent powder XRD of GeSe-xAgSbTe<sub>2</sub> (x=5%, 10%, 15%, 20%).

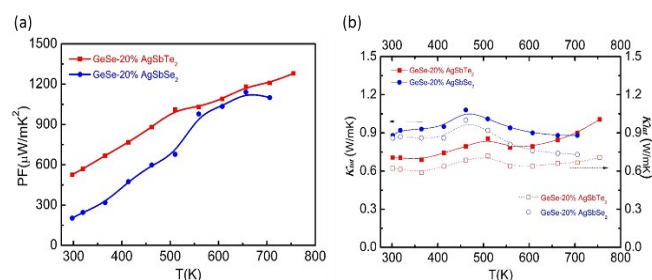

**Fig. S5** Comparison of power factor (a) and thermal conductivity ( $\kappa_{tot}$ ,  $\kappa_{lat}$ ) (b) of GeSeAg<sub>0.2</sub>Sb<sub>0.2</sub>Te<sub>0.4</sub> and GeSeAg<sub>0.2</sub>Sb<sub>0.2</sub>Se<sub>0.4</sub>.

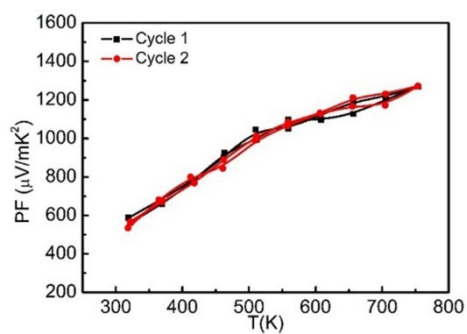

**Fig. S6** Power factor of  $\text{GeSeAg}_{0.2}\text{Sb}_{0.2}\text{Te}_{0.4}$  during two-cycle heating-cooling processes.

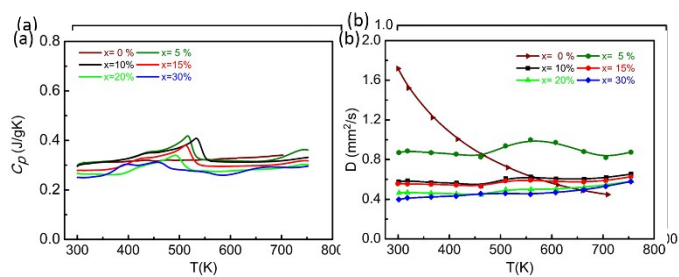

**Fig. S7** Temperature dependence of heat capacity (a) and<sup>f</sup> thermal diffusion coefficients (b) of  $\text{GeSe-xAgSbTe}_2$ .
